# Supplementary material for: Effect of Helicobacter pylori Treatment on Long-term Mortality in Patients with Hypertension
Source: PubMed Central journal article supplement — Gut Liver. 2019 Jul 24;14(1):47–56. doi: 10.5009/gnl18510 (PMC6974335; doi:10.5009/gnl18510), 2019-07-24
Supplement: GNL-14-047_Suppl.pdf [file GNL-14-047_Suppl.pdf]

**Supplementary Table 1.** Disease Codes Used for Patient Selection and Outcome Evaluation

| Terms in article        | ICD-10 code | Diagnosis                                                                                   |
|-------------------------|-------------|---------------------------------------------------------------------------------------------|
| Hypertension            | I10         | Essential (primary) hypertension                                                            |
| Cardiovascular disease  | I20         | Angina pectoris                                                                             |
|                         | I21         | Acute myocardial infarction                                                                 |
|                         | I22         | Subsequent myocardial infarction                                                            |
|                         | I23         | Certain current complications following acute myocardial infarction                         |
|                         | I24         | Other acute ischaemic heart diseases                                                        |
|                         | I25         | Chronic ischaemic heart disease                                                             |
| Cerebrovascular disease | I60         | Subarachnoid haemorrhage                                                                    |
|                         | I61         | Intracerebral haemorrhage                                                                   |
|                         | I62         | Other nontraumatic intracranial haemorrhage                                                 |
|                         | I63         | Cerebral infarction                                                                         |
|                         | I64         | Stroke, not specified as haemorrhage or infarction                                          |
|                         | I65         | Occlusion and stenosis of precerebral arteries, not resulting in cerebral infarction        |
|                         | I66         | Occlusion and stenosis of cerebral arteries, not resulting in cerebral infarction           |
| Oral cancer             | C00-14      | Malignant neoplasms of lip, oral cavity and pharynx                                         |
| Esophagus cancer        | C15         | Malignant neoplasm of oesophagus                                                            |
| Stomach cancer          | C16         | Malignant neoplasm of stomach                                                               |
| Colorectal cancer       | C18         | Malignant neoplasm of colon                                                                 |
|                         | C19         | Malignant neoplasm of rectosigmoid junction                                                 |
|                         | C20         | Malignant neoplasm of rectum                                                                |
| Liver cancer            | C22         | Malignant neoplasm of liver and intrahepatic bile ducts                                     |
| Biliary tract cancer    | C23         | Malignant neoplasm of gallbladder                                                           |
|                         | C24         | Malignant neoplasm of other and unspecified parts of biliary tract                          |
| Pancreatic cancer       | C25         | Malignant neoplasm of pancreas                                                              |
| Larynx cancer           | C32         | Malignant neoplasm of larynx                                                                |
|                         | C33         | Malignant neoplasm of trachea                                                               |
| Lung cancer             | C34         | Malignant neoplasm of bronchus and lung                                                     |
| Breast cancer           | C50         | Malignant neoplasm of breast                                                                |
| Ovary cancer            | C56         | Malignant neoplasm of ovary                                                                 |
| Prostate cancer         | C61         | Malignant neoplasm of prostate                                                              |
| Kidney cancer           | C64         | Malignant neoplasm of kidney, except renal pelvis                                           |
| Bladder cancer          | C67         | Malignant neoplasm of bladder                                                               |
| Brain and CNS cancer    | C70         | Malignant neoplasm of meninges                                                              |
|                         | C71         | Malignant neoplasm of brain                                                                 |
|                         | C72         | Malignant neoplasm of spinal cord, cranial nerves and other parts of central nervous system |
| Thyroid cancer          | C73         | Malignant neoplasm of thyroid gland                                                         |
| Hodgkin lymphoma        | C81         | Hodgkin lymphoma                                                                            |
| Non-Hodgkin lymphoma    | C82         | Follicular lymphoma                                                                         |
|                         | C83         | Non-follicular lymphoma                                                                     |
|                         | C84         | Mature T/NK-cell lymphomas                                                                  |
|                         | C85         | Other and unspecified types of non-Hodgkin lymphoma                                         |
|                         | C96         | Other and unspecified malignant neoplasms of lymphoid, haematopoietic and related tissue    |
| Leukaemia               | C91         | Lymphoid leukaemia                                                                          |
|                         | C92         | Myeloid leukaemia                                                                           |
|                         | C93         | Monocytic leukaemia                                                                         |
|                         | C94         | Other leukaemias of specified cell type                                                     |
|                         | C95         | Leukaemia of unspecified cell type                                                          |
